# Supplementary material for: Consensus-based recommendations for the management of juvenile localised scleroderma
Source: PubMed Central journal article supplement — Ann Rheum Dis. 2019 Mar 2;78(8):1019–24. doi: 10.1136/annrheumdis-2018-214697 (PMC6691928; doi:10.1136/annrheumdis-2018-214697), 2019-03-02
Supplement: annrheumdis-2018-214697supp001.pdf [file annrheumdis-2018-214697supp001.pdf]

**Search terms for JLS Diagnosis/Assessment** Localized Scleroderma, Morphea (morphoea), Classification, Biopsy - Pathology (Histology), Thermography, Ultrasound, Laser doppler flowmetry, MRI, Medical photography, Skin score (index) , Localized scleroderma severity index (LoSSI) , Localized scleroderma damage index (LoSDI), Modified Rodnan skin score, Computerized skin score, Durometer, Autoantibodies (Antinuclear antibodies (ANA), Anti-histone antibodies (AHA), anti-U1RNP, Anti-DNA topoisomerase II $\alpha$  (anti-topo II $\alpha$ ), anti-cardiolipin antibodies (aCL), lupus anticoagulant (LAC), beta2-glycoproteinI ( $\beta$ 2GPI), Antifibrillin-1 antibodies, Rheumatoid factor (RF)

**Search terms for JLS Treatment** Corticosteroids (parenteral, oral, topical), UV light (+/- psoralen), IFN-gamma, D-Penicillamine, Methotrexate, Vitamin D (oral/topical, Cyclosporine A, Hydroxychloroquine, Imiquimod, Physical therapy, Occupational therapy, Splinting, Plastic surgery, Ortodontics

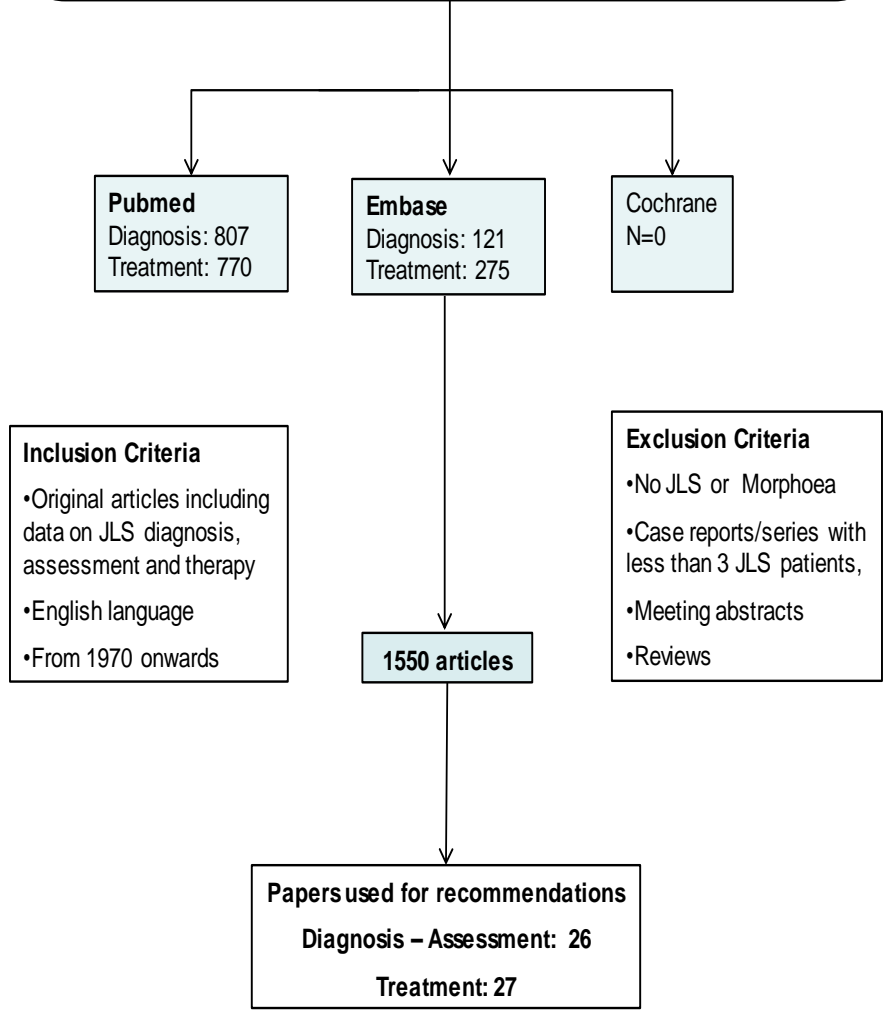

**Supplementary figure 1** Flow chart of search strategy for systematic literature review with detailed results of search
